# Supplementary material for: Effects of Milk-Derived Extracellular Vesicles on the Colonic Transcriptome and Proteome in Murine Model
Source: MDPI journal article supplement (doi:10.3390/nu14153057), 2022-07-26
Supplement: s1 [file s1]

Supplementary tables

**Table S1** The list of primer sequences.

| Genes        | Forward                       | Reverse                      |
|--------------|-------------------------------|------------------------------|
| IL-1 $\beta$ | 5'-CTTTCCCGTGGACCTTCCAG-3'    | 5'-ATGGGAACGTCACACACCAG-3'   |
| IL-6         | 5'-GGCGTTTGGGTGCTTCTCTGT-3'   | 5'-GTGGAGGAGAGGTCGTCTTGCT-3' |
| CXCL1        | 5'-CGCCTATCGCCAATGAGCTG-3'    | 5'-GACTTCGGTTTGGGTGCAGT-3'   |
| CXCL2        | 5'-CACCAACCACCAGGCTACAG-3'    | 5'-TTTGACCGCCCTTGAGAGTG-3'   |
| CXCL3        | 5'-CCATCCAGAGCTTGACGGTG-3'    | 5'-TGGGGGTTGAGGCAAAC TTC-3'  |
| CXCL5        | 5'-TCCTCAGTCATAGCCGCAAC-3'    | 5'-ATGACTTCCACCGTAGGGCA-3'   |
| GAPDH        | 5'-TCAAGCTCATTTCTGGTATGAC -3' | 5'-GGATAGGGCCTCTCTTGCTC-3'   |

**Table S2** The results of raw reads after quality control.

| Sample    | Raw Reads | Raw Bases   | Clean Reads | Clean Bases | Q30    | GC     |
|-----------|-----------|-------------|-------------|-------------|--------|--------|
| DSS1      | 115430150 | 17314522500 | 113165272   | 16609775892 | 92.47% | 49.07% |
| DSS2      | 108079222 | 16211883300 | 105961128   | 15549272743 | 92.81% | 48.24% |
| DSS3      | 103622982 | 15543447300 | 101790180   | 14962216665 | 93.30% | 48.19% |
| DSS4      | 100936008 | 15140401200 | 98754824    | 14503433026 | 92.33% | 48.17% |
| DSS5      | 103422984 | 15513447600 | 101109714   | 14891815698 | 92.65% | 48.12% |
| DSS6      | 103859934 | 15578990100 | 101672186   | 14937526802 | 93.03% | 48.66% |
| DSS+mEVs1 | 117158740 | 17573811000 | 114738168   | 16908658773 | 92.67% | 48.30% |
| DSS+mEVs2 | 117901596 | 17685239400 | 115459844   | 16983991091 | 93.17% | 48.32% |
| DSS+mEVs3 | 102074758 | 15311213700 | 99996516    | 14662777611 | 92.73% | 48.42% |
| DSS+mEVs4 | 107387930 | 16108189500 | 105206816   | 15467333086 | 93.03% | 48.85% |
| DSS+mEVs5 | 102624438 | 15393665700 | 100720102   | 14784428593 | 93.21% | 48.18% |
| DSS+mEVs6 | 106509012 | 15976351800 | 104467794   | 15314626997 | 90.75% | 48.40% |
